# Supplementary material
Source: PubMed Central journal article supplement (PMC208832)
Supplement: pnas_100_20_11765__4.pdf [file pnas_100_20_11765__4.pdf]

LAX bHLH STDPQSVAARERRHRISDRFRVLRSLVPGGSKMDTVSMLEQAIHYVKFL  
CB652841 -K-P--V---L--E---E-I-I-QR-----T-----A---DE-----  
CB662792 -S-P-TV---Q--E---E-L---QK-----A-----A---DE-AN-LR--  
AP003381 -S-P-TV---L--E-V---L---QK-----N-----A---DE-AS-L---  
CB645724 AT-PH-I-E-L--E--AE-M-A-QE--PNTN-T-RAA--DEILDYVK--
