# Supplementary material
Source: PubMed Central journal article supplement (PMC208832)

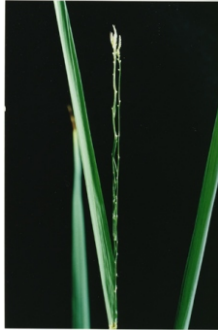

*lax-2/lax-2*

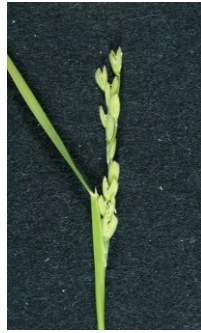

*lax-2/lax-2; ACT::LAX/+*

Supplement: pnas_100_20_11765__2.pdf [file pnas_100_20_11765__2.pdf]

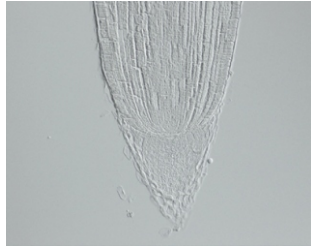

*LAX*

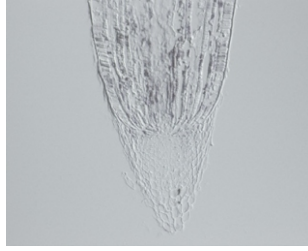

*Histone1A*

Supplement: pnas_100_20_11765__6.pdf [file pnas_100_20_11765__6.pdf]
